# Supplementary material for: Impact of the Physical Cellular Microenvironment on the Structure and Function of a Model Hepatocyte Cell Line for Drug Toxicity Applications
Source: MDPI journal article supplement (doi:10.3390/cells12192408), 2023-10-05
Supplement: s1 [file s1]

| <b>Common Name</b>                                    | <b>Gene ID</b> | <b>Forward Sequence</b> |
|-------------------------------------------------------|----------------|-------------------------|
| <b>Antithrombin</b>                                   | SERPINC1       | CTTGAGGTAAATGAAGAAGGC   |
| <b>N-cadherin</b>                                     | CDH2           | CTGGAACATATGTGATGACC    |
| <b>Fibrinogen gamma chain</b>                         | FGG            | CTGGGACAATGACAATGATAAG  |
| <b>Vasodilator-stimulated phosphoprotein</b>          | VASP           | GGAATTGCAGAAAGTGAAAG    |
| <b>Transforming growth factor <math>\beta</math>1</b> | TGFB1          | AACCCACAACGAAATCTATG    |
| <b>Zyxin</b>                                          | ZYX            | ACTACCACAAGCAGTACG      |
| <b>SUN1</b>                                           | SUN1           | GTGTTTCTTCTTACCAGGTG    |
| <b>SUN2</b>                                           | SUN2           | AGCCTTCAGATTCTCTTCAG    |
| <b>Hepcidin</b>                                       | HAMP           | GTTTTCCACAACAGACG       |
| <b>Sulfotransferase 1A1</b>                           | SULT1A1        | CTTCTATGAAGACATGAAGGAG  |
| <b>Glutathione S-transferase A1</b>                   | GSTA1          | AGGTATAGCAGATTTGGGTG    |
| <b>Albumin</b>                                        | ALB            | AGCCTACCATGAGAATAAGAG   |
| <b>Hypoxanthine-guanine phosphoribosyltransferase</b> | HPRT1          | ATAAGCCAGACTTTGTTGG     |
| <b>DNA topoisomerase 1</b>                            | TOP1           | CAAAGACGAAGAAGGTAGTAG   |
| <b>Ubiquitin C</b>                                    | UBC            | CGTCACTTGACAATGCAG      |

**Supplementary Table S1:** Predesigned KiCqStart® SYBR® Green Primers used in RTqPCR.

| Target               | Supplier                   | Product Code | Application        | Dilution | Rationale                                                                                                                                                        |
|----------------------|----------------------------|--------------|--------------------|----------|------------------------------------------------------------------------------------------------------------------------------------------------------------------|
| SUN-1                | Abcam                      | ab124770     | Immunofluorescence | 1:200    | Structural component of the complex that links the nucleus to the cytoskeleton and is implicated in mechanotransduction                                          |
| SUN-2                | Abcam                      | ab124916     | Immunofluorescence | 1:200    | Structural component of the complex that links the nucleus to the cytoskeleton and is implicated in mechanotransduction                                          |
| Albumin              | Santa Cruz Biotechnologies | sc-271605    | Western Blotting   | 1:500    | Synthesized by the liver and is a commonly used biomarker to assess hepatic function                                                                             |
| $\alpha$ -Fibrinogen | Santa Cruz Biotechnologies | sc-398806    | Western Blotting   | 1:500    | Glycoprotein that constitutes the major component of a blood clot and is synthesized by the liver, therefore can infer information regarding liver functionality |
| $\beta$ -actin       | Abcam                      | ab8224       | Western Blotting   | 1:1,000  | Widely accepted loading control commonly used in Western Blot validation                                                                                         |

#### Supplementary Table S2: Primary Antibodies

Primary antibodies and their suppliers, used in both immunofluorescence and western blotting. In both cases primary antibodies were incubated overnight at 4 °C prior to wash steps and addition of secondary antibodies. Rationale supporting their choice and relevance to the study is also detailed above.
